# Supplementary material for: Differentiation of Spontaneous Bacterial Peritonitis from Secondary Peritonitis in Patients with Liver Cirrhosis: Retrospective Multicentre Study
Source: MDPI journal article supplement (doi:10.3390/diagnostics13050994), 2023-03-06
Supplement: s1 [file s1]

# Differentiation of spontaneous bacterial peritonitis from secondary peritonitis in patients with liver cirrhosis: Retrospective multicentre study

## Supplementary Material

**Supplementary Table:** Comparison of SecP and SBP episodes (full table). Parameters are displayed as relative frequency in % (absolute frequency) or median (range). Parameters marked with † were not considered for the random forest and LASSO regression model. All parameters are based on episodes apart from sex and mortality, which is based on patients. The blood parameter creatinine was adapted to dialysis as previously described for MELD score calculations.<sup>27</sup> SecP, secondary peritonitis; SBP, spontaneous bacterial peritonitis; NA, not available; MELD-Na, model for end-stage liver disease with serum sodium.

| Parameters                                          | SecP episodes<br>(n=37; 35 patients) | SBP episodes<br>(n=532; 473 patients) | P-value |
|-----------------------------------------------------|--------------------------------------|---------------------------------------|---------|
| <b>Clinical parameters</b>                          |                                      |                                       |         |
| Age (years) <sup>†</sup>                            | 63 (45–92)                           | 63 (23–88)                            | 0.573   |
| Female patients <sup>†</sup>                        | 20.0% (7/35)                         | 25.2% (119/473)                       | 0.911   |
| Previous hydropic decompensation of liver cirrhosis | 82.1% (23/28; 9 NA)                  | 74.9% (341/455; 77 NA)                | 0.527   |
| Previous SBP episodes <3 months                     | 8.1% (3/37)                          | 17.4% (91/524; 8 NA)                  | 0.165   |
| Previous upper gastrointestinal bleeding <3 months  | 5.4% (2/37)                          | 6.4% (33/517; 15 NA)                  | 1.000   |
| Previous hepatic encephalopathy                     | 0% (0/37)                            | 5.1% (27/532)                         | 0.246   |
| Cancer disease                                      | 16.2% (6/37)                         | 22.3% (118/529; 3 NA)                 | 0.509   |
| Diabetes                                            | 35.1% (13/37)                        | 32.5% (173/532)                       | 0.883   |
| Chronic renal failure                               | 24.3% (9/37)                         | 22.0% (117/531; 1 NA)                 | 0.905   |
| Previous kidney or liver transplant                 | 2.7% (1/37)                          | 2.6% (14/532)                         | 1       |
| Immunosuppressive therapy                           | 22.9% (8/35; 2 NA)                   | 13.5% (70/517; 15 NA)                 | 0.133   |
| Length of stay (days) <sup>†</sup>                  | 32 (2–124)                           | 17 (1–287)                            | 0.005   |
| Number of ascitic punctures <sup>†</sup>            | 2 (1–17)                             | 3 (1–22)                              | 0.554   |
| ICU admission <sup>†</sup>                          | 73.0% (27/37)                        | 44.5% (237/532)                       | 0.001   |
| First diagnosis on ICU                              | 29.7% (11/37)                        | 17.0% (90/530; 2 NA)                  | 0.189   |
| Pleural effusion                                    | 43.2% (16/37)                        | 40.7% (210/516; 16 NA)                | 0.755   |
| Oesophageal varices                                 | 60.0% (21/35; 2 NA)                  | 63.0% (308/489; 43 NA)                | 0.865   |
| Acute upper gastrointestinal bleeding               | 5.4% (2/37)                          | 12.6% (67/532)                        | 0.296   |
| Hepatic encephalopathy                              | 29.7% (11/37)                        | 37.6% (200/532)                       | 0.434   |
| Mortality <sup>†</sup>                              | 45.7% (16/35)                        | 39.7% (188/473)                       | 0.428   |
| <b>Laboratory parameters</b>                        |                                      |                                       |         |
| Creatinine in serum (mg/dL)                         | 2.9 (1.0–4.0; 1 NA)                  | 1.7 (0.9–4.0; 9 NA)                   | 0.010   |
| C-reactive protein in serum (mg/dL)                 | 10.4 (1.1–34.3; 5 NA)                | 6.1 (0.1–32.7; 84 NA)                 | 0.004   |

|                                    |                         |                          |       |
|------------------------------------|-------------------------|--------------------------|-------|
| Bilirubin in serum (mg/dL)         | 3.4 (0.2–31.2; 1 NA)    | 3.6 (0.2–46.4; 78 NA)    | 0.239 |
| Glucose in serum (mg/dL)           | 124 (9–330; 11 NA)      | 118 (18–408; 140 NA)     | 0.955 |
| Leucocytes in blood (G/L)          | 12.7 (3.2–27.8)         | 9.1 (1.2–41.0; 6 NA)     | 0.007 |
| Platelets in blood (G/L)           | 160 (15–676; 1 NA)      | 112 (4–674; 5 NA)        | 0.080 |
| Internationalized normalized ratio | 1.4 (1.0–3.8)           | 1.5 (0.9–7.1; 47 NA)     | 0.247 |
| Leucocytes in ascites (G/L)        | 4.0 (0.5–70.3)          | 1.5 (0.1–146.0)          | 0.027 |
| Total protein in ascites (g/dL)    | 1.94 (0.29–3.74, 11 NA) | 1.40 (0.19–5.82, 110 NA) | 0.419 |

#### Microbiologic parameters

|                                                                         |               |                 |        |
|-------------------------------------------------------------------------|---------------|-----------------|--------|
| Pathogen detection                                                      | 78.4% (29/37) | 42.1% (224/532) | <0.001 |
| <i>Candida</i> spp.                                                     | 44.8% (13/29) | 13.4% (30/224)  | <0.001 |
| <i>Enterococcus</i> spp.                                                | 72.4% (21/29) | 21.9% (49/224)  | <0.001 |
| Anaerobe bacteria                                                       | 17.2% (5/29)  | 4.5% (10/224)   | 0.002  |
| Persistent detection of pathogens in ascites three days after diagnosis | 34.5% (10/29) | 13.4% (30/224)  | <0.001 |
| Polymicrobial infection                                                 | 62.1% (18/29) | 16.5% (37/224)  | <0.001 |

#### Clinical scores

|                                         |                        |                         |       |
|-----------------------------------------|------------------------|-------------------------|-------|
| Acute-on-chronic liver failure score >1 | 71.4% (25/35, 2 NA)    | 53.6% (231/431, 101 NA) | 0.007 |
| Child–Pugh score                        | 10 (7–14, 1 NA)        | 10 (7–15, 98 NA)        | 0.697 |
| MELD–Na score                           | 26.9 (11.7–40.0; 2 NA) | 26.3 (6.2–40.0; 108 NA) | 0.850 |
| Charlson Comorbidity Index              | 7 (4–14)               | 7 (3–20)                | 0.840 |
